# Supplementary material for: Diagnostic Value of Serum Lactate Dehydrogenase Level Measured in the Emergency Department in Predicting Clinical Outcome in Out-of-Hospital Cardiac Arrest: A Multicenter, Observational Study
Source: MDPI journal article supplement (doi:10.3390/jcm12083006), 2023-04-20
Supplement: s1 [file s1]

# Supplementary Materials

**Table S1.** Effect size coefficients by clinical outcomes.

|                                                     | Primary Outcome<br>( <i>n</i> = 759) | Secondary Outcome<br>( <i>n</i> = 294) | Tertiary Outcome<br>( <i>n</i> = 64) |
|-----------------------------------------------------|--------------------------------------|----------------------------------------|--------------------------------------|
|                                                     | Effect Size                          | Effect Size                            | Effect Size                          |
| Age (years) <sup>a</sup>                            | 0.013                                | 0.061                                  | 0.137                                |
| Male sex, <i>n</i> (%) <sup>b</sup>                 | 0.033                                | 0.069                                  | 0.048                                |
| Hypertension, <i>n</i> (%) <sup>b</sup>             | 0.030                                | 0.020                                  | 0.191                                |
| Diabetes mellitus, <i>n</i> (%) <sup>b</sup>        | 0.035                                | 0.029                                  | 0.125                                |
| Bystander CPR, <i>n</i> (%) <sup>b</sup>            | 0.055                                | 0.040                                  | 0.100                                |
| Witnessed, <i>n</i> (%) <sup>b</sup>                | 0.122                                | 0.049                                  | 0.112                                |
| Initial shockable rhythm, <i>n</i> (%) <sup>b</sup> | 0.099                                | 0.190                                  | 0.457                                |
| Out-of-hospital CPR time <sup>a</sup>               | 0.069                                | 0.022                                  | 0.171                                |
| In-hospital CPR time <sup>a</sup>                   | 0.255                                | 0.031                                  | 0.002                                |
| Total CPR time (min) <sup>a</sup>                   | 0.227                                | 0.039                                  | 0.090                                |
| Total epinephrine dose (mg) <sup>a</sup>            | 0.247                                | 0.026                                  | 0.003                                |
| LDH (U/L), reference value (<290 U/L) <sup>a</sup>  | 0.054                                | 0.064                                  | 0.013                                |

<sup>a</sup>Eta squared. <sup>b</sup>Cramer's *v*.

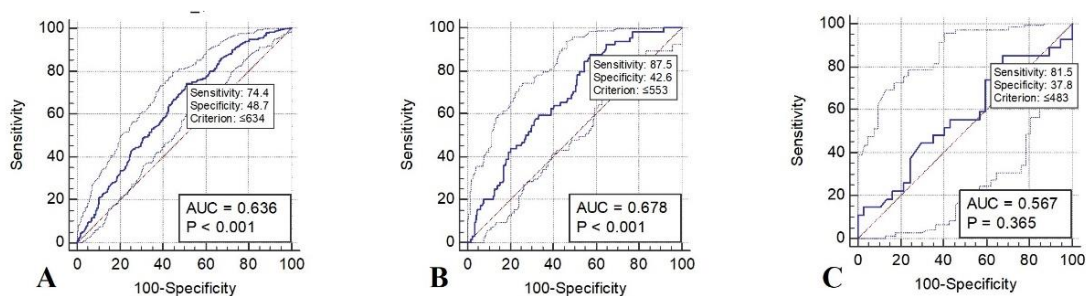

**Figure S1.** (A) Primary outcome (ROSC). (B) Secondary outcome (Survival discharge). (C) Tertiary outcome (Favorable neurologic outcome).
